# Supplementary material for: The predictive utility of patient-reported outcomes and performance status for survival in metastatic lung cancer patients treated with chemoimmunotherapy
Source: PubMed Central journal article supplement — Transl Lung Cancer Res. 2022 Mar;11(3):432–9. doi: 10.21037/tlcr-21-938 (PMC8988084; doi:10.21037/tlcr-21-938), 2022-03
Supplement: tlcr-11-03-432-supplementary.pdf [file tlcr-11-03-432-supplementary.pdf]

**Table S1** Summary of patient characteristics by treatment arm

|                                                        | Total       | Atezolizumab +<br>Bevacizumab +<br>Carboplatin +<br>Paclitaxel | Atezolizumab +<br>Carboplatin +<br>Nab-Paclitaxel | Atezolizumab +<br>Carboplatin +<br>Paclitaxel | Bevacizumab +<br>Carboplatin +<br>Paclitaxel | Carboplatin +<br>Nab-Paclitaxel | P value |
|--------------------------------------------------------|-------------|----------------------------------------------------------------|---------------------------------------------------|-----------------------------------------------|----------------------------------------------|---------------------------------|---------|
|                                                        | No. 2,892   | No. 393                                                        | No. 807                                           | No. 732                                       | No. 394                                      | No. 566                         |         |
| Actual treatment included atezolizumab                 | 1,932 (67%) | 393 (100%)                                                     | 807 (100%)                                        | 732 (100%)                                    | 0 (0%)                                       | 0 (0%)                          | < 0.001 |
| STUDY                                                  |             |                                                                |                                                   |                                               |                                              |                                 | < 0.001 |
| Mpower130                                              | 705 (24%)   | 0 (0%)                                                         | 473 (59%)                                         | 0 (0%)                                        | 0 (0%)                                       | 232 (41%)                       |         |
| IMpower131                                             | 1,000 (35%) | 0 (0%)                                                         | 334 (41%)                                         | 332 (45%)                                     | 0 (0%)                                       | 334 (59%)                       |         |
| IMpower150                                             | 1,187 (41%) | 393 (100%)                                                     | 0 (0%)                                            | 400 (55%)                                     | 394 (100%)                                   | 0 (0%)                          |         |
| Age (years)                                            | 64 (58–70)  | 63 (57–70)                                                     | 64 (58–70)                                        | 64 (58–70)                                    | 63 (57–69)                                   | 65 (58–71)                      | 0.043   |
| Sex                                                    |             |                                                                |                                                   |                                               |                                              |                                 | < 0.001 |
| Male                                                   | 1,929 (67%) | 239 (61%)                                                      | 540 (67%)                                         | 511 (70%)                                     | 233 (59%)                                    | 406 (72%)                       |         |
| Female                                                 | 963 (33%)   | 154 (39%)                                                      | 267 (33%)                                         | 221 (30%)                                     | 161 (41%)                                    | 160 (28%)                       |         |
| Race                                                   |             |                                                                |                                                   |                                               |                                              |                                 | 0.001   |
| White                                                  | 2,460 (85%) | 316 (80%)                                                      | 699 (87%)                                         | 617 (84%)                                     | 329 (84%)                                    | 499 (88%)                       |         |
| Asian                                                  | 276 (10%)   | 55 (14%)                                                       | 55 (7%)                                           | 80 (11%)                                      | 46 (12%)                                     | 40 (7%)                         |         |
| Other                                                  | 89 (3%)     | 9 (2%)                                                         | 30 (4%)                                           | 20 (3%)                                       | 13 (3%)                                      | 17 (3%)                         |         |
| Missing                                                | 67 (2%)     | 13 (3%)                                                        | 23 (3%)                                           | 15 (2%)                                       | 6 (2%)                                       | 10 (2%)                         |         |
| ECOG PS                                                |             |                                                                |                                                   |                                               |                                              |                                 | 0.062   |
| 0                                                      | 1,140 (39%) | 158 (40%)                                                      | 316 (39%)                                         | 287 (39%)                                     | 177 (45%)                                    | 202 (36%)                       |         |
| 1                                                      | 1,743 (60%) | 232 (59%)                                                      | 489 (61%)                                         | 445 (61%)                                     | 214 (54%)                                    | 363 (64%)                       |         |
| Missing                                                | 9 (<1%)     | 3 (1%)                                                         | 2 (<1%)                                           | 0 (0%)                                        | 3 (1%)                                       | 1 (<1%)                         |         |
| Smoking history                                        |             |                                                                |                                                   |                                               |                                              |                                 | < 0.001 |
| Never                                                  | 401 (14%)   | 80 (20%)                                                       | 96 (12%)                                          | 107 (15%)                                     | 76 (19%)                                     | 42 (7%)                         |         |
| Previous                                               | 1,768 (61%) | 224 (57%)                                                      | 514 (64%)                                         | 432 (59%)                                     | 229 (58%)                                    | 369 (65%)                       |         |
| Current                                                | 723 (25%)   | 89 (23%)                                                       | 197 (24%)                                         | 193 (26%)                                     | 89 (23%)                                     | 155 (27%)                       |         |
| Histology                                              |             |                                                                |                                                   |                                               |                                              |                                 | < 0.001 |
| Non-squamous                                           | 1,893 (65%) | 393 (100%)                                                     | 473 (59%)                                         | 401 (55%)                                     | 394 (100%)                                   | 232 (41%)                       |         |
| Squamous                                               | 999 (35%)   | 0 (0%)                                                         | 334 (41%)                                         | 331 (45%)                                     | 0 (0%)                                       | 334 (59%)                       |         |
| Liver tumor site at baseline                           | 417 (14%)   | 49 (12%)                                                       | 124 (15%)                                         | 105 (14%)                                     | 55 (14%)                                     | 84 (15%)                        | 0.74    |
| PD-L1 highest of TC and IC expression level (official) |             |                                                                |                                                   |                                               |                                              |                                 | 0.86    |
| 0                                                      | 1,418 (49%) | 187 (48%)                                                      | 401 (50%)                                         | 346 (47%)                                     | 196 (50%)                                    | 288 (51%)                       |         |
| 1                                                      | 502 (17%)   | 68 (17%)                                                       | 127 (16%)                                         | 148 (20%)                                     | 67 (17%)                                     | 92 (16%)                        |         |
| 2                                                      | 470 (16%)   | 64 (16%)                                                       | 135 (17%)                                         | 116 (16%)                                     | 59 (15%)                                     | 96 (17%)                        |         |
| 3                                                      | 499 (17%)   | 74 (19%)                                                       | 143 (18%)                                         | 120 (16%)                                     | 72 (18%)                                     | 90 (16%)                        |         |
| Missing                                                | 3 (<1%)     | 0 (0%)                                                         | 1 (<1%)                                           | 2 (<1%)                                       | 0 (0%)                                       | 0 (0%)                          |         |
| Comorbidity count                                      | 7 (4–11)    | 6 (4–11)                                                       | 8 (5–12)                                          | 6 (4–10)                                      | 6 (4–10)                                     | 7 (4–11)                        | < 0.001 |

Data are median (IQR) or number of patients (%). P values per Chi-Square test for categorical data and Kruskal-Wallis test for continuous data.

**Table S2** Summary of pre-treatment patient-reported outcome values by treatment arm

|                        | Reference Value* | Atezolizumab +<br>Bevacizumab +<br>Carboplatin + Paclitaxel | Atezolizumab +<br>Carboplatin +<br>Nab-Paclitaxel | Atezolizumab +<br>Carboplatin +<br>Paclitaxel | Bevacizumab +<br>Carboplatin +<br>Paclitaxel | Carboplatin +<br>Nab-Paclitaxel | P-value |
|------------------------|------------------|-------------------------------------------------------------|---------------------------------------------------|-----------------------------------------------|----------------------------------------------|---------------------------------|---------|
|                        | No. 1,313        | No. 393                                                     | No. 807                                           | No. 732                                       | No. 394                                      | No. 566                         |         |
| Global Health Status   |                  |                                                             |                                                   |                                               |                                              |                                 | 0.058   |
| Median (IQR)           | 58.3 (41.7–66.7) | 67 (50–83)                                                  | 62 (50–75)                                        | 67 (50–83)                                    | 67 (50–83)                                   | 58 (50–75)                      |         |
| Missing                |                  | 37 (9%)                                                     | 87 (11%)                                          | 67 (9%)                                       | 34 (9%)                                      | 78 (14%)                        |         |
| Physical Function      |                  |                                                             |                                                   |                                               |                                              |                                 | 0.14    |
| Median (IQR)           | 73.3 (46.7–86.7) | 80 (60–93)                                                  | 80 (60–88)                                        | 80 (60–93)                                    | 80 (60–93)                                   | 80 (60–88)                      |         |
| Missing                |                  | 37 (9%)                                                     | 87 (11%)                                          | 67 (9%)                                       | 34 (9%)                                      | 78 (14%)                        |         |
| Role Function          |                  |                                                             |                                                   |                                               |                                              |                                 | 0.18    |
| Median (IQR)           | 66.7 (33.3–83.3) | 67 (50–100)                                                 | 67 (33–100)                                       | 67 (50–100)                                   | 67 (50–100)                                  | 67 (50–100)                     |         |
| Missing                |                  | 37 (9%)                                                     | 87 (11%)                                          | 67 (9%)                                       | 34 (9%)                                      | 78 (14%)                        |         |
| Emotional Function     |                  |                                                             |                                                   |                                               |                                              |                                 | 0.064   |
| Median (IQR)           | 66.7 (50–83.3)   | 75 (58–92)                                                  | 75 (58–92)                                        | 75 (67–92)                                    | 75 (58–83)                                   | 75 (58–92)                      |         |
| Missing                |                  | 37 (9%)                                                     | 87 (11%)                                          | 67 (9%)                                       | 34 (9%)                                      | 78 (14%)                        |         |
| Cognitive Function     |                  |                                                             |                                                   |                                               |                                              |                                 | 0.18    |
| Median (IQR)           | 83.3 (66.7–100)  | 83 (67–100)                                                 | 100 (67–100)                                      | 100 (67–100)                                  | 83 (67–100)                                  | 100 (67–100)                    |         |
| Missing                |                  | 37 (9%)                                                     | 87 (11%)                                          | 67 (9%)                                       | 34 (9%)                                      | 78 (14%)                        |         |
| Social Function        |                  |                                                             |                                                   |                                               |                                              |                                 | 0.48    |
| Median (IQR)           | 66.7 (50–100)    | 83 (67–100)                                                 | 83 (67–100)                                       | 83 (67–100)                                   | 83 (67–100)                                  | 83 (67–100)                     |         |
| Missing                |                  | 37 (9%)                                                     | 87 (11%)                                          | 67 (9%)                                       | 34 (9%)                                      | 78 (14%)                        |         |
| Fatigue                |                  |                                                             |                                                   |                                               |                                              |                                 | 0.053   |
| Median (IQR)           | 44.4 (22.2–66.7) | 33 (22–56)                                                  | 33 (22–56)                                        | 33 (22–56)                                    | 33 (22–44)                                   | 33 (22–56)                      |         |
| Missing                |                  | 37 (9%)                                                     | 87 (11%)                                          | 67 (9%)                                       | 34 (9%)                                      | 78 (14%)                        |         |
| Nausea and Vomiting    |                  |                                                             |                                                   |                                               |                                              |                                 | 0.62    |
| Median (IQR)           | 0 (0–16.7)       | 0 (0–0)                                                     | 0 (0–17)                                          | 0 (0–0)                                       | 0 (0–17)                                     | 0 (0–0)                         |         |
| Missing                |                  | 37 (9%)                                                     | 87 (11%)                                          | 67 (9%)                                       | 34 (9%)                                      | 78 (14%)                        |         |
| Pain                   |                  |                                                             |                                                   |                                               |                                              |                                 | 0.84    |
| Median (IQR)           | 33.3 (0–66.7)    | 17 (0–50)                                                   | 17 (0–50)                                         | 17 (0–50)                                     | 33 (0–50)                                    | 33 (0–50)                       |         |
| Missing                |                  | 37 (9%)                                                     | 87 (11%)                                          | 67 (9%)                                       | 34 (9%)                                      | 78 (14%)                        |         |
| Dyspnoea               |                  |                                                             |                                                   |                                               |                                              |                                 | 0.021   |
| Median (IQR)           | 33.3 (0–66.7)    | 33 (0–33)                                                   | 33 (0–67)                                         | 33 (0–67)                                     | 33 (0–67)                                    | 33 (0–67)                       |         |
| Missing                |                  | 37 (9%)                                                     | 87 (11%)                                          | 67 (9%)                                       | 34 (9%)                                      | 78 (14%)                        |         |
| Insomnia               |                  |                                                             |                                                   |                                               |                                              |                                 | 0.1     |
| Median (IQR)           | 33.3 (0–66.7)    | 33 (0–67)                                                   | 33 (0–67)                                         | 33 (0–33)                                     | 33 (0–67)                                    | 33 (0–67)                       |         |
| Missing                |                  | 37 (9%)                                                     | 87 (11%)                                          | 67 (9%)                                       | 34 (9%)                                      | 78 (14%)                        |         |
| Appetite Loss          |                  |                                                             |                                                   |                                               |                                              |                                 | 0.29    |
| Median (IQR)           | 33.3 (0–66.7)    | 0 (0–33)                                                    | 33 (0–33)                                         | 33 (0–33)                                     | 0 (0–33)                                     | 33 (0–33)                       |         |
| Missing                |                  | 37 (9%)                                                     | 87 (11%)                                          | 67 (9%)                                       | 34 (9%)                                      | 78 (14%)                        |         |
| Constipation           |                  |                                                             |                                                   |                                               |                                              |                                 | 0.008   |
| Median (IQR)           | 0 (0–33.3)       | 0 (0–33)                                                    | 0 (0–33)                                          | 0 (0–33)                                      | 0 (0–33)                                     | 0 (0–33)                        |         |
| Missing                |                  | 37 (9%)                                                     | 87 (11%)                                          | 67 (9%)                                       | 34 (9%)                                      | 78 (14%)                        |         |
| Diarrhoea              |                  |                                                             |                                                   |                                               |                                              |                                 | 0.6     |
| Median (IQR)           | 0 (0–0)          | 0 (0–0)                                                     | 0 (0–0)                                           | 0 (0–0)                                       | 0 (0–0)                                      | 0 (0–0)                         |         |
| Missing                |                  | 37 (9%)                                                     | 87 (11%)                                          | 67 (9%)                                       | 34 (9%)                                      | 78 (14%)                        |         |
| Financial Difficulties |                  |                                                             |                                                   |                                               |                                              |                                 | 0.11    |
| Median (IQR)           | 0 (0–33.3)       | 0 (0–33)                                                    | 0 (0–33)                                          | 0 (0–33)                                      | 0 (0–33)                                     | 0 (0–33)                        |         |
| Missing                |                  | 37 (9%)                                                     | 87 (11%)                                          | 67 (9%)                                       | 34 (9%)                                      | 78 (14%)                        |         |

Data are median (IQR) or number of patients (%). P values per Chi-Square test for categorical data and Kruskal-Wallis test for continuous data. \*, Reference value according to EORTC QLQ-C30 Tables of Reference Values for Lung cancer: stage III-IV (p. 181).

**Table S3** Univariable and multivariable association between PROs and OS for patients treated with atezolizumab

| PRO                    | Univariable |      |              |        |      | Multivariable <sup>#</sup> |      |              |        |
|------------------------|-------------|------|--------------|--------|------|----------------------------|------|--------------|--------|
|                        | n           | HR*  | 95% CI       | P      | c    | n                          | HR*  | 95% CI       | P      |
| Physical Function      | 1741        | 0.84 | 0.82 to 0.87 | <0.001 | 0.62 | 1686                       | 0.87 | 0.84 to 0.89 | <0.001 |
| Fatigue                | 1741        | 1.15 | 1.12 to 1.18 | <0.001 | 0.61 | 1686                       | 1.14 | 1.11 to 1.17 | <0.001 |
| Appetite Loss          | 1741        | 1.11 | 1.09 to 1.13 | <0.001 | 0.6  | 1686                       | 1.1  | 1.08 to 1.12 | <0.001 |
| Pain                   | 1741        | 1.12 | 1.09 to 1.14 | <0.001 | 0.6  | 1686                       | 1.1  | 1.08 to 1.13 | <0.001 |
| Role Function          | 1741        | 0.91 | 0.89 to 0.93 | <0.001 | 0.6  | 1686                       | 0.93 | 0.91 to 0.95 | <0.001 |
| Global Health Status   | 1741        | 0.88 | 0.86 to 0.91 | <0.001 | 0.59 | 1686                       | 0.9  | 0.87 to 0.93 | <0.001 |
| Social Function        | 1741        | 0.91 | 0.89 to 0.93 | <0.001 | 0.58 | 1686                       | 0.92 | 0.89 to 0.94 | <0.001 |
| Dyspnoea               | 1741        | 1.07 | 1.05 to 1.09 | <0.001 | 0.56 | 1686                       | 1.06 | 1.04 to 1.09 | <0.001 |
| Constipation           | 1741        | 1.09 | 1.06 to 1.11 | <0.001 | 0.56 | 1686                       | 1.07 | 1.05 to 1.10 | <0.001 |
| Nausea and Vomiting    | 1741        | 1.1  | 1.06 to 1.14 | <0.001 | 0.55 | 1686                       | 1.09 | 1.05 to 1.13 | <0.001 |
| Insomnia               | 1741        | 1.05 | 1.03 to 1.07 | <0.001 | 0.54 | 1686                       | 1.04 | 1.02 to 1.07 | <0.001 |
| Emotional Function     | 1741        | 0.95 | 0.92 to 0.98 | <0.001 | 0.54 | 1686                       | 0.95 | 0.92 to 0.98 | <0.001 |
| Cognitive Function     | 1741        | 0.95 | 0.92 to 0.98 | 0.002  | 0.52 | 1686                       | 0.96 | 0.93 to 0.99 | 0.013  |
| Financial Difficulties | 1741        | 1.03 | 1.01 to 1.05 | 0.009  | 0.52 | 1686                       | 1.03 | 1.00 to 1.05 | 0.035  |
| Diarrhoea              | 1741        | 1    | 0.96 to 1.04 | 0.997  | 0.5  | 1686                       | 1    | 0.95 to 1.04 | 0.851  |

CI, confidence interval; HR, hazard ratio, \*, HR based on 10-unit increase, <sup>#</sup>, Adjusted for Age, Sex, Race, ECOG-PS, Smoking history, Histology, Liver tumor site at baseline, PD-L1 highest of TC and IC expression level (official) and comorbidity count.

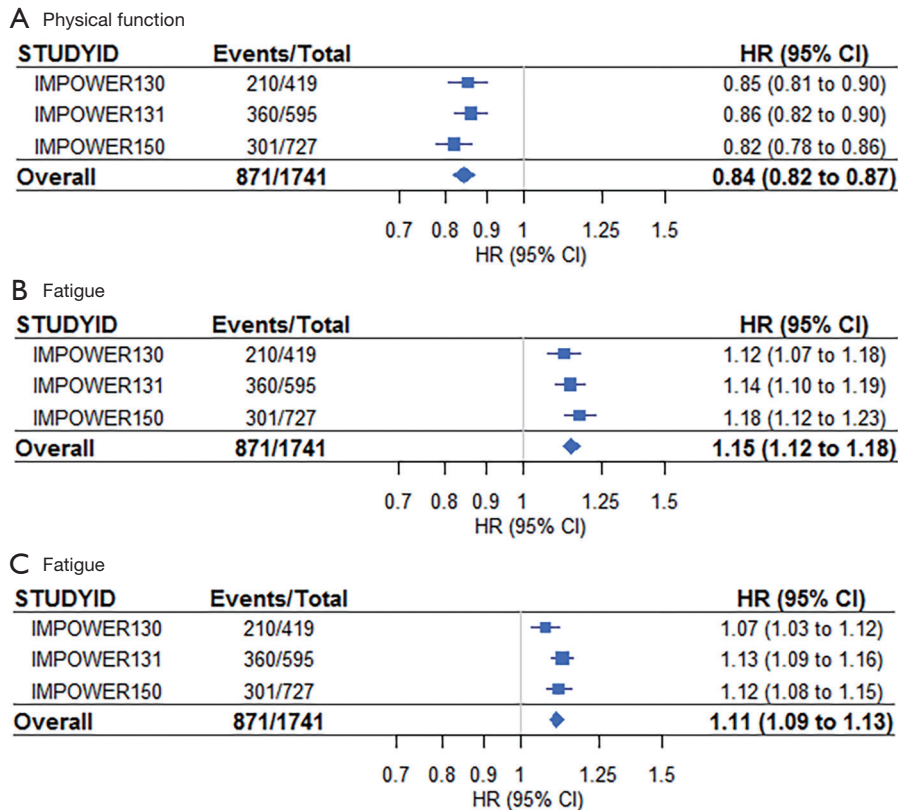

**Figure S1** Univariable association between patient-reported physical function, fatigue and appetite loss with OS for patients treated with atezolizumab by study.

**Table S4** Univariable and multivariable association between PROs and PFS for patients treated with atezolizumab

| PRO                    | Univariable |      |              |        |      | Multivariable <sup>#</sup> |      |              |        |
|------------------------|-------------|------|--------------|--------|------|----------------------------|------|--------------|--------|
|                        | n           | HR*  | 95% CI       | P      | c    | n                          | HR*  | 95% CI       | P      |
| Fatigue                | 1741        | 1.09 | 1.07 to 1.11 | <0.001 | 0.57 | 1686                       | 1.08 | 1.06 to 1.11 | <0.001 |
| Physical Function      | 1741        | 0.9  | 0.88 to 0.93 | <0.001 | 0.57 | 1686                       | 0.91 | 0.89 to 0.94 | <0.001 |
| Pain                   | 1741        | 1.08 | 1.06 to 1.10 | <0.001 | 0.57 | 1686                       | 1.07 | 1.05 to 1.09 | <0.001 |
| Role Function          | 1741        | 0.94 | 0.92 to 0.95 | <0.001 | 0.56 | 1686                       | 0.95 | 0.93 to 0.97 | <0.001 |
| Global Health Status   | 1741        | 0.92 | 0.90 to 0.94 | <0.001 | 0.56 | 1686                       | 0.93 | 0.91 to 0.96 | <0.001 |
| Appetite Loss          | 1741        | 1.06 | 1.04 to 1.08 | <0.001 | 0.56 | 1686                       | 1.05 | 1.04 to 1.07 | <0.001 |
| Social Function        | 1741        | 0.93 | 0.91 to 0.95 | <0.001 | 0.55 | 1686                       | 0.94 | 0.92 to 0.96 | <0.001 |
| Dyspnoea               | 1741        | 1.04 | 1.02 to 1.06 | <0.001 | 0.54 | 1686                       | 1.04 | 1.02 to 1.06 | <0.001 |
| Emotional Function     | 1741        | 0.95 | 0.93 to 0.97 | <0.001 | 0.53 | 1686                       | 0.95 | 0.93 to 0.97 | <0.001 |
| Constipation           | 1741        | 1.05 | 1.03 to 1.07 | <0.001 | 0.53 | 1686                       | 1.04 | 1.02 to 1.06 | <0.001 |
| Insomnia               | 1741        | 1.02 | 1.01 to 1.04 | 0.004  | 0.53 | 1686                       | 1.02 | 1.01 to 1.04 | 0.011  |
| Nausea and Vomiting    | 1741        | 1.06 | 1.02 to 1.09 | <0.001 | 0.53 | 1686                       | 1.05 | 1.02 to 1.09 | 0.002  |
| Cognitive Function     | 1741        | 0.96 | 0.94 to 0.99 | 0.003  | 0.52 | 1686                       | 0.97 | 0.94 to 1.00 | 0.026  |
| Financial Difficulties | 1741        | 1.02 | 1.00 to 1.04 | 0.044  | 0.51 | 1686                       | 1.01 | 0.99 to 1.03 | 0.251  |
| Diarrhoea              | 1741        | 1.01 | 0.98 to 1.05 | 0.468  | 0.5  | 1686                       | 1.01 | 0.98 to 1.05 | 0.565  |

CI=confidence interval, HR=hazard ratio, \*, HR based on 10-unit increase, <sup>#</sup>, Adjusted for Age, Sex, Race, ECOG-PS, Smoking history, Histology, Liver tumor site at baseline and PD-L1 highest of TC and IC expression level (official).

**Table S5** Summary of patient-reported physical function raw scores by physician- assessed ECOG-PS in patients treated with atezolizumab

|                                     | Total<br>No. 1,927 | 0<br>No. 761 | 1+<br>No. 1,166 | P-value |
|-------------------------------------|--------------------|--------------|-----------------|---------|
| Physical function                   |                    |              |                 | < 0.001 |
| High                                | 456 (24%)          | 247 (32%)    | 209 (18%)       |         |
| Intermediate                        | 1,010 (52%)        | 379 (50%)    | 631 (54%)       |         |
| Low                                 | 270 (14%)          | 45 (6%)      | 225 (19%)       |         |
| Missing                             | 191 (10%)          | 90 (12%)     | 101 (9%)        |         |
| Trouble doing strenuous activities  |                    |              |                 | < 0.001 |
| 1                                   | 351 (18%)          | 181 (24%)    | 170 (15%)       |         |
| 2                                   | 540 (28%)          | 222 (29%)    | 318 (27%)       |         |
| 3                                   | 318 (17%)          | 101 (13%)    | 217 (19%)       |         |
| 4                                   | 193 (10%)          | 39 (5%)      | 154 (13%)       |         |
| Missing                             | 525 (27%)          | 218 (29%)    | 307 (26%)       |         |
| Trouble taking a long walk          |                    |              |                 | < 0.001 |
| 1                                   | 373 (19%)          | 196 (26%)    | 177 (15%)       |         |
| 2                                   | 496 (26%)          | 195 (26%)    | 301 (26%)       |         |
| 3                                   | 310 (16%)          | 105 (14%)    | 205 (18%)       |         |
| 4                                   | 223 (12%)          | 47 (6%)      | 176 (15%)       |         |
| Missing                             | 525 (27%)          | 218 (29%)    | 307 (26%)       |         |
| Trouble taking a short walk         |                    |              |                 | < 0.001 |
| 1                                   | 869 (45%)          | 394 (52%)    | 475 (41%)       |         |
| 2                                   | 357 (19%)          | 120 (16%)    | 237 (20%)       |         |
| 3                                   | 126 (7%)           | 25 (3%)      | 101 (9%)        |         |
| 4                                   | 50 (3%)            | 4 (1%)       | 46 (4%)         |         |
| Missing                             | 525 (27%)          | 218 (29%)    | 307 (26%)       |         |
| Stay in bed or chair during the day |                    |              |                 | < 0.001 |
| 1                                   | 774 (40%)          | 377 (50%)    | 397 (34%)       |         |
| 2                                   | 392 (20%)          | 127 (17%)    | 265 (23%)       |         |
| 3                                   | 182 (9%)           | 26 (3%)      | 156 (13%)       |         |
| 4                                   | 54 (3%)            | 13 (2%)      | 41 (4%)         |         |
| Missing                             | 525 (27%)          | 218 (29%)    | 307 (26%)       |         |
| Need help eating, dressing, washing |                    |              |                 | < 0.001 |
| 1                                   | 1,261 (65%)        | 522 (69%)    | 739 (63%)       |         |
| 2                                   | 101 (5%)           | 16 (2%)      | 85 (7%)         |         |
| 3                                   | 29 (2%)            | 4 (1%)       | 25 (2%)         |         |
| 4                                   | 11 (1%)            | 1 (<1%)      | 10 (1%)         |         |
| Missing                             | 525 (27%)          | 218 (29%)    | 307 (26%)       |         |

Data are median (IQR) or number of patients (%). P values per Chi-Square test for categorical data and Kruskal-Wallis test for continuous data. 1 = Not at All, 2 = A Little, 3 = Quite a bit, 4 = Very much.

**Table S6** Associations between patient-reported physical function and ECOG-PS with PFS for patients treated with atezolizumab

|                   | Univariable |                     |        |      | Multivariable <sup>#</sup> |                     |        |
|-------------------|-------------|---------------------|--------|------|----------------------------|---------------------|--------|
|                   | n           | HR [95% CI]         | P      | c    | n                          | HR [95% CI]         | P      |
| Physical function |             |                     | <0.001 | 0.56 |                            |                     | <0.001 |
| Low               | 270         | 1.86 [1.57 to 2.21] |        |      | 270                        | 1.71 [1.43 to 2.04] |        |
| Intermediate      | 1013        | 1.34 [1.18 to 1.53] |        |      | 1010                       | 1.30 [1.14 to 1.49] |        |
| High              | 458         | 1                   |        |      | 456                        | 1                   |        |
| ECOG-PS           | 1927        |                     | <0.001 | 0.55 |                            |                     | <0.001 |
| 0                 | 761         | 1                   |        |      | 671                        |                     |        |
| 1+                | 1166        | 1.44 [1.30 to 1.60] |        |      | 1065                       | 1.32 [1.17 to 1.48] |        |

<sup>#</sup>, Model includes pre-treatment physical function and ECOG-PS. CI, confidence interval; HR, hazard ratio.
